# Supplementary material for: Tracking errors and their determinants: Evidence from Hong Kong exchange traded funds
Source: Preprints.org preprint supplement (doi:10.20944/preprints201607.0094.v1), 2016-07-29
Supplement: Supplementary file 1 [file supplementary]

| **Table 2. Tracking error of ETFs in the sample** | | | | | | | | | | | | | | | |
| --- | --- | --- | --- | --- | --- | --- | --- | --- | --- | --- | --- | --- | --- | --- | --- |
|  |  | **Absolute Difference in Returns** | | | |  | **Return Differences** | |  | **CAPM** | | | |  | **Average** |
| **Fund** | ***N*** | **Mean (TE1)** | **Std. Dev.** | **Min.** | **Max** |  | **Std. Dev. (TE2)** | **Mean** |  | **S.E. of Reg. (TE3)** | ***α*** | ***β*** | ***R2* (TE4)** |  | **TE1+2+3** |
| *(a) Physical Hong Kong equity underlying* | | | | | | | | | | | | | | | |
| 1 | 3165 | 0.2495 | 0.2647 | 0.0000 | 3.5981 |  | 0.3638 | 0.0005 |  | 0.3602 | 0.0007 | 0.9681 | 0.9499 |  | 0.3245 |
| 2 | 2640 | 0.6043 | 0.6792 | 0.0000 | 8.3035 |  | 0.9092 | 0.0002 |  | 0.9072 | -0.0008 | 0.9986 | 0.8116 |  | 0.8069 |
| 3 | 946 | 1.6524 | 1.9101 | 0.0000 | 17.7761 |  | 2.5260 | 0.0298 |  | 1.9495 | -0.0159 | 0.1694 | 0.0275 |  | 2.0426 |
| 4 | 2123 | 0.2924 | 0.3625 | 0.0000 | 5.3196 |  | 0.4657 | -0.0081 |  | 0.4217 | 0.0004 | 0.9977 | 0.9649 |  | 0.3933 |
| 5 | 1898 | 0.2320 | 0.3044 | 0.0000 | 3.1004 |  | 0.3827 | -0.0001 |  | 0.3815 | 0.0002 | 0.9815 | 0.9517 |  | 0.3321 |
| 6 | 1712 | 0.5770 | 0.7238 | 0.0000 | 7.0022 |  | 0.9257 | -0.0002 |  | 0.9015 | 0.0033 | 0.9043 | 0.8308 |  | 0.8014 |
| *(b) Physical Non-Hong Kong equity underlying* | | | | | | | | | | | | | | | |
| 7 | 1346 | 1.2352 | 1.3106 | 0.0000 | 11.4455 |  | 1.8012 | -0.0143 |  | 1.7836 | -0.0125 | 0.8607 | 0.4393 |  | 1.6067 |
| *(c) Synthetic (swap-based) Non-Hong Kong equity underlying* | | | | | | | | | | | | | | | |
| 8 | 933 | 1.6868 | 1.9638 | 0.0000 | 15.2303 |  | 2.5894 | 0.0083 |  | 1.9456 | -0.0011 | 0.0601 | 0.0031 |  | 2.0739 |
| 9 | 933 | 1.4393 | 1.6657 | 0.0000 | 14.8678 |  | 2.2018 | -0.0174 |  | 2.1399 | -0.0320 | 0.6098 | 0.1275 |  | 1.9270 |
| 10 | 1332 | 0.9335 | 0.8437 | 0.0000 | 6.1027 |  | 1.2585 | -0.0040 |  | 1.1328 | -0.0021 | 0.5996 | 0.3452 |  | 1.1083 |
| 11 | 1221 | 1.2405 | 1.3117 | 0.0000 | 12.1480 |  | 1.8056 | -0.0221 |  | 1.7741 | -0.0214 | 0.8233 | 0.4432 |  | 1.6068 |
| 12 | 1227 | 1.2682 | 1.3423 | 0.0000 | 10.3561 |  | 1.8470 | 0.0010 |  | 1.5570 | -0.0190 | 0.2556 | 0.0459 |  | 1.5574 |
| 13 | 1221 | 0.7983 | 1.0425 | 0.0000 | 12.7786 |  | 1.3131 | -0.0179 |  | 1.2385 | -0.0218 | 1.2483 | 0.7594 |  | 1.1167 |
| 14 | 933 | 0.9316 | 0.9300 | 0.0000 | 6.7843 |  | 1.3164 | 0.0296 |  | 1.0563 | -0.0022 | 0.5390 | 0.4315 |  | 1.1014 |
| 15 | 1227 | 0.7381 | 0.7982 | 0.0000 | 7.0552 |  | 1.0874 | -0.0091 |  | 1.0672 | -0.0093 | 0.8772 | 0.6655 |  | 0.9642 |
| 16 | 933 | 0.9855 | 1.1577 | 0.0000 | 11.3403 |  | 1.5206 | -0.0208 |  | 1.4889 | -0.0231 | 0.7978 | 0.4068 |  | 1.3317 |
| 17 | 1220 | 1.6053 | 1.8271 | 0.0000 | 22.7401 |  | 2.4326 | -0.0008 |  | 1.7346 | 0.0140 | 0.0229 | 0.0005 |  | 1.9242 |
| 18 | 1204 | 2.1311 | 2.2179 | 0.0000 | 22.8258 |  | 3.0763 | -0.0193 |  | 2.7365 | -0.0253 | 0.5080 | 0.2208 |  | 2.6480 |
| 19 | 933 | 0.7249 | 0.9909 | 0.0000 | 12.5650 |  | 1.2279 | -0.0025 |  | 1.2247 | -0.0007 | 1.0609 | 0.6565 |  | 1.0592 |
| *(d) Synthetic (derivative embedded)* | | | | | | | | | | | | | | | |
| 20 | 1856 | 0.9550 | 1.1300 | 0.0000 | 11.5069 |  | 1.4796 | 0.0172 |  | 1.4754 | 0.0188 | 0.9391 | 0.5922 |  | 1.3033 |
| 21 | 1163 | 0.9170 | 1.8251 | 0.0000 | 40.3714 |  | 2.0427 | 0.0023 |  | 2.0255 | -0.0016 | 0.8680 | 0.4378 |  | 1.6617 |
| *Note:* Tracking errors are expressed in percentage terms from the inception of ETFs to December 31 2011 using daily data. *N* represents the number of observations for each ETF used in this study. TE1 is obtained from the average absolute difference between the returns on ETF and its benchmark; TE2 is obtained from the standard deviation of difference between returns on ETF and its benchmark; TE3 is the standard error of regression in the regression model of ETF return on the returns of its benchmark; and TE4 is the R-square of CAPM model. | | | | | | | | | | | | | | | |
