# Supplementary material for: Tracking errors and their determinants: Evidence from Hong Kong exchange traded funds
Source: Preprints.org preprint supplement (doi:10.20944/preprints201607.0094.v1), 2016-07-29
Supplement: Supplementary file 2 [file Table 1.doc]

| **Table 1. Sample ETFs (with fully operation from 2009) as at 31/12/2011** | | | | |  |  |
| --- | --- | --- | --- | --- | --- | --- |
| **Fund** | **Fund Name** | **Stock Code** | **Index Being Traced Defined in Investment Objective** | **Listing Date** | **Fund Size (HK $mil) as at 31/12/2011** | **Expense Ratio as at 31/12/2011** |
| *(a) Physical Hong Kong equity underlying* | | | | |  |  |
| 1 | Tracker Fund of Hong Kong | 2800 | Hang Seng Index | 15 Nov. 1999 | $48,320 | 0.15% |
| 2 | iShares MSCI China Index ETF | 2801 | MSCI China Index | 28 Nov. 2001 | $1,137 | 1.04% |
| 3 | W.I.S.E. – CSI HK 100 Tracker | 2825 | CSI HK100 Index | 15 May 2008 | $79 | 1.51% |
| 4 | Hang Seng H-Share Index ETF | 2828 | Hang Seng China Enterprises Index | 10 Dec. 2003 | $18,167 | 0.75% |
| 5 | Hang Seng Index ETF | 2833 | Hang Seng Index | 21 Sept. 2004 | $26,520 | 0.22% |
| 6 | Hang Seng FTSE/Xinhua China 25 Index ETF | 2838 | FTSE / Xinhua China 25 Index | 8 June 2005 | $180 | 1.28% |
| *(b) Physical Non-Hong Kong equity underlying* | | | | |  |  |
| 7 | iShares BSE SENSEX India Index ETF | 2836 | BSE Sensitivity Index | 2 Nov. 2006 | $1,400 | 1.63% |
| *(c) Synthetic (swap-based) Non-Hong Kong equity underlying* | | | | |  |  |
| 8 | LYXOR ETF FTSE RAFI US 1000 | 2803 | FTSE USA All Cap Index | 3 June 2008 | $561 | 0.69% |
| 9 | LYXOR ETF FTSE RAFI Europe | 2806 | FTSE Developed ex US All Cap Index | 3 June 2008 | $158 | 0.82% |
| 10 | LYXOR ETF Commodities CRB (Reuters/Jefferies CRB Index) | 2809 | Reuters/Jefferies CRB Index | 22 Nov. 2006 | $13,257 | 0.28% |
| 11 | LYXOR ETF MSCI India | 2810 | MSCI India Index | 26 April 2007 | $23,642 | 0.42% |
| 12 | LYXOR ETF MSCI World | 2812 | MSCI World Index | 18 April 2007 | $7,494 | 0.01% |
| 13 | LYXOR ETF MSCI Korea | 2813 | MSCI Korea Index | 26 April 2007 | $1,243 | 0.86% |
| 14 | LYXOR ETF Japan (TOPIX) | 2814 | TOPIX | 3 June 2008 | $8,879 | 0.29% |
| 15 | LYXOR ETF MSCI AC Asia-Pacific ex Japan | 2815 | MSCI AC (All Country) Asia-Pacific ex Japan | 18 April 2007 | $5,041 | 0.68% |
| 16 | LYXOR ETF MSCI Emerging Markets | 2820 | MSCI Emerging Markets | 3 June 2008 | $12,647 | 0.62% |
| 17 | LYXOR ETF NASDAQ-100 | 2826 | NASDAQ 100 Index | 27 April 2007 | $2,777 | 0.26% |
| 18 | LYXOR ETF Russia (DJ RUSINDEX TITANS 10) | 2831 | DJ RUSINDEX TITANS 10 | 21 May 2007 | $9,713 | 0.68% |
| 19 | LYXOR ETF MSCI Taiwan | 2837 | MSCI Taiwan Index | 3 June 2008 | $710 | 0.84% |
| *(d) Synthetic (derivative embedded)* | | | | |  |  |
| 20 | iShares FTSE A50 China Index ETF | 2823 | FTSE / Xinhua China A50 Index | 18 Nov. 2004 | $64,115 | 1.67% |
| 21 | W.I.S.E. – CSI 300 China Tracker | 2827 | CSI 300 Index | 17 July 2007 | $5,520 | 2.68% |
