# Supplementary material for: Tracking errors and their determinants: Evidence from Hong Kong exchange traded funds
Source: Preprints.org preprint supplement (doi:10.20944/preprints201607.0094.v1), 2016-07-29
Supplement: Supplementary file 4 [file Table 3.doc]

| **Table 3. t-test of the difference between tracking errors of physical and synthetic ETFs** | | | | | | | |
| --- | --- | --- | --- | --- | --- | --- | --- |
|  | **Physical ETFs** | |  | **Synthetic ETFs** | | **t-statistics** | **p-value** |
| **Mean** | **Std. Dev.** |  | **Mean** | **Std. Dev.** |
| **Panel A** |  |  |  |  |  |  |  |
| TE1 | 0.6918 | 0.5485 |  | 1.1682 | 0.4158 | -2.2283 * | 0.0191 |
| TE2 | 1.0535 | 0.8201 |  | 1.7999 | 0.5984 | -2.3842 * | 0.0139 |
| TE3 | 0.9579 | 0.6643 |  | 1.6141 | 0.4826 | -2.5935 ** | 0.0089 |
| *Note:* Panel A presents the results of pooled-variance t-test of the evidence that the mean tracking error of synthetic ETFs (*n* = 14) is significantly higher than that of physical ETFs (*n* = 7) in the sample. | | | | | | | |
|  | **Physical ETFs** | |  | **Synthetic ETFs** | |  |  |
|  | **Mean** | **Std. Dev.** |  | **Mean** | **Std. Dev.** | **t-statistics** | **p-value** |
| **Panel B** |  |  |  |  |  |  |  |
| Alpha | -0.0035 | 0.0075 |  | -0.0091 | 0.0152 | 0.9047 | 0.1885 |
| Beta | 0.8400 | 0.3002 |  | 0.6578 | 0.3610 | 1.1478 | 0.1326 |
| *Note:* Panel B presents the results of pooled-variance t-test of the evidence that the mean alpha and beta of synthetic ETFs (*n* = 14) is significantly lower than that of physical ETFs (*n* = 7) in the sample. | | | | | | | |
| * denotes significant at 5%; ** denotes significant at 1%. | | | | | | | |
