# Supplementary material for: Tracking errors and their determinants: Evidence from Hong Kong exchange traded funds
Source: Preprints.org preprint supplement (doi:10.20944/preprints201607.0094.v1), 2016-07-29
Supplement: Supplementary file 5 [file Table 4.doc]

| **Table 4. t-test of the mean difference of different definition of tracking errors** | | | | |
| --- | --- | --- | --- | --- |
| **Definition of Tracing Errors** | **Mean** | **Std. Dev.** | **t-statistics** | **p-value** |
| TE1 – TE2 | -0.5416 | 0.2786 | -8.9084 ** | 0.0000 |
| TE1 – TE3 | -0.3859 | 0.2428 | -7.2836 ** | 0.0000 |
| TE2 – TE3 | 0.1557 | 0.2261 | 3.1561 ** | 0.0049 |
| *Note:* The table presents the results of paired-sample t-test of the evidence that the tracking error defined as different definition is different (n = 21).    * denotes significant at 5%; ** denotes significant at 1%. | | | | |
