# Supplementary material for: Tracking errors and their determinants: Evidence from Hong Kong exchange traded funds
Source: Preprints.org preprint supplement (doi:10.20944/preprints201607.0094.v1), 2016-07-29
Supplement: Supplementary file 7 [file Table 6.doc]

| **Table 6. Factors influencing tracking errors of physical ETFs** | | | | | | |
| --- | --- | --- | --- | --- | --- | --- |
|  | *TE1* | | *TE2* | | *TE3* | |
|  | Model (6) | Model (7) | Model (6) | Model (7) | Model (6) | Model (7) |
| SIZE | -3.3860 (-1.6363) |  | -4.4780 (-1.6289) |  | -0.7732 (-0.4503) |  |
| EXP | -1.3952 (-1.7575) |  | -1.5670 (-1.4859) |  | -0.0783 (-0.1189) |  |
| DIV | 0.1675 (0.7737) |  | 0.3043 (1.0581) |  | 0.1376 (0.7661) |  |
| VOL |  | -0.0017 (-0.0389) |  | 0.0008 (1.0041) |  | 0.0819 (1.2512) |
| RISK |  | 67.8962 ** (10.5076) |  | 100.1240 ** (783.0371) |  | 29.0056** (3.0652) |
| Adj. R2 | 0.6553 | 0.9384 | 0.3755 | 0.9999 | 0.8722 | 0.9289 |
| F-statistics | 5.2263 ** | 39.1472 ** | 2.3365 | 101096.3 ** | 16.1697 ** | 33.6926** |
| *Note:* The table presents the results of panel regression model with fixed effects estimation for 7 physical ETFs over the period 2009-2011. The coefficients of natural logarithm of size (size is measured in HKD million), scaled expense ratio, dividend yield, natural logarithm of trading volume, and risk of the market are shown as well as the adjusted R2 and F-statistics for testing the overall significance of the model, for all three tracking errors. t-statistics are in the parentheses.  Model number (6):  Model number (7): | | | | | | |
| * denotes significant at 5%; ** denotes significant at 1% | | | | | | |
